# Supplementary material for: MicroRNA-154-5p regulates the HPV16 E7-pRb pathway in Cervical Carcinogenesis by targeting CUL2
Source: PubMed Central journal article supplement (PMC7391205; doi:10.7150/jca.45871), 2020-07-11
Supplement: jcav11p5379s1.pdf [file jcav11p5379s1.pdf]

**Supplementary Table 1. Differently expressed miRNAs in normal cervix, CIN3 and SCC tissues.**

| Transcript Cluster ID | Normal cervix | CIN3  | SCC   | FC          | ANOVA p-value | Transcript ID    | Accession    | Sequence Length | Sequence                 |
|-----------------------|---------------|-------|-------|-------------|---------------|------------------|--------------|-----------------|--------------------------|
| 20500132              | 5.84          | 5.7   | 6.97  | 2.411615655 | 0.011473      | hsa-miR-18a-5p   | MIMAT0000072 | 23              | UAAGGUGCAUCUAGUGCAGAUAG  |
| 20500133              | 2.54          | 2.63  | 4.11  | 2.969047141 | 0.009958      | hsa-miR-18a-3p   | MIMAT0002891 | 23              | ACUGCCCUAAGUGCUCUUCUGG   |
| 20500142              | 3.63          | 4.51  | 5.47  | 3.580100284 | 0.002311      | hsa-miR-21-3p    | MIMAT0004494 | 21              | CAACACCAGUCGAUGGGCUGU    |
| 20500145              | 4.56          | 4.65  | 5.75  | 2.281527432 | 0.010072      | hsa-miR-23a-5p   | MIMAT0004496 | 22              | GGGGUCCUGGGGAUGGGAAUUU   |
| 20500150              | 3.72          | 4.42  | 5.32  | 3.031433133 | 0.000513      | hsa-miR-25-5p    | MIMAT0004498 | 21              | AGGCGGAGACUUGGGCAAUUG    |
| 20500156              | 2.51          | 3.86  | 5.64  | 8.75434961  | 0.000411      | hsa-miR-27a-5p   | MIMAT0004501 | 22              | AGGGCUUAGCUGCUUGUGAGCA   |
| 20500170              | 1.27          | 2.6   | 4.22  | 7.727490631 | 0.000473      | hsa-miR-92a-1-5p | MIMAT0004507 | 23              | AGGUUGGGAUCCGUUGCAAUGCU  |
| 20500174              | 4.83          | 4.79  | 5.87  | 2.114036081 | 0.023707      | hsa-miR-93-3p    | MIMAT0004509 | 22              | ACUGCUGAGCUAGCACUUCGCCG  |
| 20500181              | 11.73         | 11.29 | 9.42  | 4.9588308   | 0.006134      | hsa-miR-99a-5p   | MIMAT0000097 | 22              | AACCCGUAGAUCCGAUCUUGUG   |
| 20500183              | 10.45         | 10.45 | 8.66  | 3.458148925 | 0.047895      | hsa-miR-100-5p   | MIMAT0000098 | 22              | AACCCGUAGAUCCGAACUUGUG   |
| 20500393              | 1.54          | 1.28  | 5.53  | 19.02731384 | 0.00429       | hsa-miR-196a-5p  | MIMAT0000226 | 22              | UAGGUAGUUUCAUGUUGUUGGG   |
| 20500400              | 10.32         | 10.76 | 9.28  | 2.789487333 | 0.012829      | hsa-miR-199a-3p  | MIMAT0000232 | 22              | ACAGUAGUCUGCACAUUGGUUA   |
| 20500438              | 7.28          | 8.24  | 6.04  | 4.59479342  | 0.019024      | hsa-miR-10a-5p   | MIMAT0000253 | 23              | UACCCGUAGAUCCGAAUUUGUG   |
| 20500450              | 8.22          | 8.53  | 9.25  | 2.042024251 | 0.038977      | hsa-miR-182-5p   | MIMAT0000259 | 24              | UUUGGCAAUGGUAGAACUCACACU |
| 20500452              | 4.59          | 5.97  | 6.62  | 4.084048503 | 0.009666      | hsa-miR-183-5p   | MIMAT0000261 | 22              | UAUGGCACUGGUAGAAUUCACU   |
| 20500453              | 1.11          | 1.71  | 3.26  | 4.438277888 | 0.010949      | hsa-miR-183-3p   | MIMAT0004560 | 22              | GUGAAUUACCGAAGGGCCAUA    |
| 20500457              | 4.69          | 4.65  | 1.86  | 7.110741449 | 0.034627      | hsa-miR-199b-5p  | MIMAT0000263 | 23              | CCCAGUGUUUAGACUAUCUGUUC  |
| 20500458              | 10.32         | 10.76 | 9.28  | 2.789487333 | 0.012829      | hsa-miR-199b-3p  | MIMAT0004563 | 22              | ACAGUAGUCUGCACAUUGGUUA   |
| 20500463              | 0.91          | 0.85  | 2.67  | 3.530811985 | 0.031006      | hsa-miR-205-3p   | MIMAT0009197 | 21              | GAUUUCAGUGGAGUGAAGUUC    |
| 20500489              | 4.6           | 5.63  | 6.55  | 3.863745316 | 0.029366      | hsa-miR-224-5p   | MIMAT0000281 | 21              | CAAGUCACUAGUGGUUCCGUU    |
| 20500555              | 6.25          | 7.91  | 7.46  | 3.160165247 | 0.029931      | hsa-miR-200b-5p  | MIMAT0004571 | 22              | CAUCUUACUGGGCAGCAUUGGA   |
| 20500556              | 7.5           | 9.13  | 8.4   | 3.095129987 | 0.046326      | hsa-miR-200b-3p  | MIMAT0000318 | 22              | UAAUACUGCCUGGUAAUGAUGA   |
| 20500722              | 4.01          | 5.01  | 5.77  | 3.386981249 | 0.003796      | hsa-miR-27b-5p   | MIMAT0004588 | 22              | AGAGCUUAGCUGAUUGGUGAAC   |
| 20500730              | 12.58         | 12.57 | 11.15 | 2.694467154 | 0.003039      | hsa-miR-125b-5p  | MIMAT0000423 | 22              | UCCUGAGACCCUAACUUGUGA    |
| 20500784              | 3.37          | 3.18  | 0.76  | 6.105036836 | 0.002713      | hsa-miR-154-5p   | MIMAT0000452 | 22              | UAGGUUAUCCGUGUUGCCUUCG   |
| 20500798              | 10.68         | 10.9  | 8.87  | 4.084048503 | 0.000612      | hsa-miR-195-5p   | MIMAT0000461 | 21              | UAGCAGCACAGAAUAUUGGC     |
| 20501159              | 3.14          | 2.49  | 1.55  | 3.010493495 | 0.048142      | hsa-miR-29c-5p   | MIMAT0004673 | 22              | UGACCGAUUUCUCCUGGUGUUC   |
| 20501172              | 1.08          | 1.98  | 0.64  | 2.531513188 | 0.024299      | hsa-miR-299-5p   | MIMAT0002890 | 22              | UGGUUUACCGUCCCAUAACAU    |
| 20501224              | 4.76          | 4.67  | 2.05  | 6.543216468 | 0.0358        | hsa-miR-376c-3p  | MIMAT0000720 | 21              | AACAUAGAGGAAAUCCACGU     |

|          |      |      |      |             |          |                   |              |    |                          |
|----------|------|------|------|-------------|----------|-------------------|--------------|----|--------------------------|
| 20501249 | 2.94 | 2.76 | 1.08 | 3.630076621 | 0.038799 | hsa-miR-381-3p    | MIMAT0000736 | 22 | UAUACAAGGGCAAGCUCUCUGU   |
| 20501281 | 4.72 | 3.77 | 2.02 | 6.498019171 | 0.032777 | hsa-miR-337-5p    | MIMAT0004695 | 21 | GAACGGCUUCAUACAGGAGUU    |
| 20502125 | 2.8  | 3.54 | 1.21 | 5.028053498 | 0.006824 | hsa-miR-424-5p    | MIMAT0001341 | 22 | CAGCAGCAAUUCAUGUUUUGAA   |
| 20502235 | 1.79 | 2.34 | 3.9  | 4.316912946 | 0.001094 | hsa-miR-18b-5p    | MIMAT0001412 | 23 | UAAGGUGCAUCUAGUGCAGUUAG  |
| 20502441 | 2.6  | 3.96 | 1.19 | 6.821079134 | 0.010122 | hsa-miR-433-3p    | MIMAT0001627 | 22 | AUCAUGAUGGGCUCUCGGUGU    |
| 20503803 | 8.1  | 7.73 | 7.09 | 2.0139111   | 0.021848 | hsa-miR-494-3p    | MIMAT0002816 | 22 | UGAAACAUAACACGGGAAACCUC  |
| 20503877 | 1.93 | 2.83 | 3.25 | 2.496661098 | 0.025726 | hsa-miR-501-5p    | MIMAT0002872 | 22 | AAUCCUUUGUCCUCGGUGAGA    |
| 20504325 | 1.8  | 2.85 | 3.45 | 3.138336392 | 0.039014 | hsa-miR-550a-3p   | MIMAT0003257 | 22 | UGUCUUACUCCUCAGGCACAU    |
| 20504353 | 0.82 | 1.61 | 2.03 | 2.313376368 | 0.038855 | hsa-miR-612       | MIMAT0003280 | 25 | GCUGGGCAGGGCUUCUGAGCUCCU |
| 20504357 | 0.33 | 0.41 | 1.82 | 2.808889751 | 0.006142 | hsa-miR-615-3p    | MIMAT0003283 | 22 | UCCGAGCCUGGGUCUCCUCUU    |
| 20504362 | 5.89 | 3.7  | 1.12 | 27.28431654 | 0.040973 | hsa-miR-617       | MIMAT0003286 | 22 | AGACUCCCAUUUGAAGGUGGC    |
| 20504390 | 1.49 | 2.72 | 2.37 | 2.345669898 | 0.013819 | hsa-miR-637       | MIMAT0003307 | 24 | ACUGGGGGCUUUCGGCUCUGCGU  |
| 20504407 | 1.14 | 2.22 | 2.38 | 2.361985323 | 0.004941 | hsa-miR-652-5p    | MIMAT0022709 | 25 | CAACCCUAGGAGAGGGUGCCAUUC |
| 20504421 | 4.11 | 3.9  | 1.48 | 6.190259974 | 0.007056 | hsa-miR-654-3p    | MIMAT0004814 | 22 | UAUGUCUGCUGACCAUCACCUU   |
| 20504434 | 2.03 | 3.01 | 0.72 | 4.890561111 | 0.045974 | hsa-miR-542-5p    | MIMAT0003340 | 23 | UCGGGAUCAUCAUGUCACGAGA   |
| 20504556 | 2.06 | 3.06 | 3.26 | 2.29739671  | 0.009567 | hsa-miR-550a-3-5p | MIMAT0020925 | 20 | AGUGCCUGAGGGAGUAAGAG     |
| 20505789 | 0.96 | 2.6  | 0.75 | 3.60500185  | 0.047856 | hsa-miR-885-5p    | MIMAT0004947 | 22 | UCCAUUACACUACCCUGCCUCU   |
| 20506002 | 3.41 | 4.67 | 4.58 | 2.394957409 | 0.016407 | hsa-miR-933       | MIMAT0004976 | 22 | UGUGCGCAGGGAGACCUCUCC    |
| 20506818 | 1.18 | 1.73 | 4.73 | 11.71268557 | 0.001508 | hsa-miR-1290      | MIMAT0005880 | 19 | UGGAUUUUUGGAUCAGGGA      |
| 20506837 | 7.1  | 7.75 | 8.8  | 3.249009585 | 0.009619 | hsa-miR-1246      | MIMAT0005898 | 19 | AAUGGAUUUUUGGAGCAGG      |
| 20506887 | 1.92 | 2.64 | 3.04 | 2.173469725 | 0.000435 | hsa-miR-1292-5p   | MIMAT0005943 | 25 | UGGGAACGGGUUCCGGCAGACGCU |
| 20509232 | 1.77 | 2.06 | 0.44 | 3.073750363 | 0.027465 | hsa-miR-1912      | MIMAT0007887 | 22 | UACCCAGAGCAUGCAGUGUGAA   |
| 20509235 | 0.97 | 2.3  | 2.01 | 2.514026749 | 0.010508 | hsa-miR-1914-3p   | MIMAT0007890 | 22 | GGAGGGGUCCGCACUGGGAGG    |
| 20515607 | 8.5  | 9.48 | 9.68 | 2.265767771 | 0.002746 | hsa-miR-3178      | MIMAT0015055 | 17 | GGGGCGCGCCGGAUCG         |
| 20515610 | 5.38 | 6.39 | 6.43 | 2.070529848 | 0.010024 | hsa-miR-3180-3p   | MIMAT0015058 | 22 | UGGGGCGGAGCUUCCGGAGGCC   |
| 20515623 | 3.09 | 4.01 | 4.11 | 2.02791896  | 0.013168 | hsa-miR-3187-3p   | MIMAT0015069 | 20 | UUGGCAUGGGGUCGCGCGG      |
| 20517817 | 0.49 | 1.87 | 1.52 | 2.602683711 | 0.005233 | hsa-miR-3610      | MIMAT0017987 | 20 | GAAUCGAAAGGAGGCGCCG      |
| 20517821 | 6.53 | 7.32 | 7.99 | 2.751083636 | 0.02787  | hsa-miR-3613-3p   | MIMAT0017991 | 24 | ACAAAAAAAAAAGCCAACCCUUC  |
| 20517824 | 2.25 | 3.33 | 3.48 | 2.345669898 | 0.005343 | hsa-miR-3615      | MIMAT0017994 | 21 | UCUCUCGGUCUCCUCGCGGUC    |
| 20517916 | 5    | 5.67 | 6.23 | 2.345669898 | 0.008639 | hsa-miR-3663-3p   | MIMAT0018085 | 23 | UGAGCACACACAGGCCGGGCGC   |
| 20518785 | 4.9  | 6.64 | 6.45 | 3.340351678 | 0.038644 | hsa-miR-4417      | MIMAT0018929 | 18 | GGUGGGCUUCCCGGAGGG       |
| 20518818 | 6.23 | 6.88 | 7.36 | 2.188587403 | 0.029035 | hsa-miR-4443      | MIMAT0018961 | 17 | UUGGAGGCGUGGGUUUU        |

|          |      |      |      |             |          |                  |              |    |                           |
|----------|------|------|------|-------------|----------|------------------|--------------|----|---------------------------|
| 20518844 | 5.67 | 5.57 | 4.42 | 2.37841423  | 0.046067 | hsa-miR-4462     | MIMAT0018986 | 23 | UGACACGGAGGGUGGCUUGGGAA   |
| 20518919 | 4.91 | 4.76 | 6.43 | 3.182145935 | 0.006492 | hsa-miR-4521     | MIMAT0019058 | 22 | GCUAAGGAAGUCCUGUGCUCAG    |
| 20519573 | 3.83 | 4.97 | 4.7  | 2.203810232 | 0.030294 | hsa-miR-4730     | MIMAT0019852 | 23 | CUGGCGGAGCCCAUCCAUGCCA    |
| 20519588 | 2.33 | 3.82 | 3.77 | 2.808889751 | 0.025629 | hsa-miR-4738-3p  | MIMAT0019867 | 22 | UGAAACUGGAGCGCCUGGAGGA    |
| 20519670 | 1.75 | 3.22 | 3.29 | 2.907945035 | 0.000201 | hsa-miR-4783-3p  | MIMAT0019947 | 23 | CCCCGUGUUGGGGCGGUCUGC     |
| 20525414 | 3.44 | 4.6  | 4.86 | 2.67585511  | 0.024649 | hsa-miR-6726-5p  | MIMAT0027353 | 21 | CGGGAGCUGGGGUCUGCAGGU     |
| 20525432 | 2.51 | 3.88 | 3.39 | 2.584705661 | 0.016537 | hsa-miR-6735-5p  | MIMAT0027371 | 25 | CAGGGCAGAGGGCACAGGAAUCUGA |
| 20525442 | 1.59 | 2.64 | 2.46 | 2.070529848 | 0.046065 | hsa-miR-6740-5p  | MIMAT0027381 | 22 | AGUUUGGGAUGGAGAGAGGAGA    |
| 20525509 | 3.47 | 4.56 | 4.55 | 2.128740365 | 0.001692 | hsa-miR-6774-5p  | MIMAT0027448 | 25 | ACUUGGGCAGGAGGGACCCUGUAUG |
| 20525611 | 2.01 | 3.57 | 2.92 | 2.948538435 | 0.039101 | hsa-miR-6825-5p  | MIMAT0027550 | 22 | UGGGGAGGUGUGGAGUCAGCAU    |
| 20525633 | 4.46 | 5.12 | 5.77 | 2.4794154   | 0.005709 | hsa-miR-6780b-5p | MIMAT0027572 | 23 | UGGGGAAGGCUUGGCAGGGAAGA   |
| 20525653 | 3.21 | 4.59 | 4.44 | 2.602683711 | 0.010016 | hsa-miR-6846-5p  | MIMAT0027592 | 22 | UGGGGGCUGGAUGGGGUAGAGU    |
| 20525701 | 3.9  | 4.71 | 5.08 | 2.265767771 | 0.017735 | hsa-miR-6870-5p  | MIMAT0027640 | 19 | UGGGGGAGAUGGGGUUGA        |
| 20525731 | 1.13 | 2.26 | 2.16 | 2.188587403 | 0.044783 | hsa-miR-6885-5p  | MIMAT0027670 | 25 | AGGGGGGCACUGCGCAAGCAAAGCC |
| 20526180 | 3.94 | 5.03 | 4.71 | 2.128740365 | 0.024455 | hsa-miR-7111-5p  | MIMAT0028119 | 22 | UGGGGGAGGAAGGACAGGCCAU    |
| 20526182 | 2.29 | 3.45 | 3.64 | 2.549121255 | 0.014317 | hsa-miR-7112-5p  | MIMAT0028121 | 22 | ACGGGCAGGGCAGUGCACCCUG    |

# Fold Change cut-off: 2.0

# P-value cut-off: 0.05

# Conditions: cervical cancer (SCC)\_vs\_CIN3\_vs\_Normal cervix

# Column A: Transcript Cluster ID, it represents transcript cluster name.

# Column B - D: Bi-weight Avg Signal (log2), Normalized Intensity of each group (averaged normalized intensities of each group, log2 transformed)

# Column E: FC, the absolute ratio (no log scale) of normalized intensities between three conditions.

# Column F: ANOVA P value (All Conditions), P value calculated from the student's t-test.

# Column G: Transcript ID (Array Design).

# Column H: Accession.

# Column I: Sequence Length.

# Column J: Sequence from miRBase.
